# Supplementary material
Source: Research Square preprint supplement (doi:10.21203/rs.3.rs-8881048/v1)
Supplement: Supplementary file 1 [file 67601d15416e00721c8792dc.docx]

**Dental Technology Professional Training Survey**

Hello! We are the research team from Xiamen Medical College conducting the "Survey on the Demand for and Training of Dental Technology Professionals." We sincerely invite you to participate in this survey.

This survey aims to understand the views of employers, higher education institutions, and graduates regarding the training of dental technology professionals, so as to provide a basis for optimizing talent cultivation. The questionnaire consists of two main parts: basic information and the perspectives of the three parties. There are no right or wrong answers. This study has been approved by the Ethics Committee of Xiamen Medical College . The questionnaire is anonymous, and the data will be used solely for academic research and will not be disclosed. Participation is completely voluntary, and you may withdraw at any time.

**Informed Consent Option:**

□ I have read and understood the above information and agree to participate in this survey.

(If you agree, please continue to fill out the questionnaire; if you disagree, please close this page.)

# General information

## Your identity? (Single choice)

A. Graduates

B. Higher education institutions (Skip to Question 9)

C. Employers (Skip to Question 13)

## Name of graduating institution: _______________ (Fill in the blank)

## Year of graduation: _______________ (Fill in the blank)

## Are you currently engaged in technician/mechanic work? (Single choice)

A. Yes

B. No (Skip to Question 6)

## Current qualification level: (Single choice)

A. Junior Technician

B. Technician

C. Supervising Technician

D. Associate Chief Technician

E. Chief Technician

F. Primary Prosthesis Maker

G. Intermediate Prosthesis Maker

H. Advanced Prosthesis Maker

I. Technician

J. Senior Technician

K. None

## Employer: _______________ (Fill in the blank)

## Job position: _______________ (Fill in the blank)

## Are you satisfied with the professional teaching at your alma mater? (Single choice)

A. Very satisfied
B. Satisfied
C. Average
D. Dissatisfied
E. Very dissatisfied

## Institution name: _______________ (Fill in the blank)

## Which region is your institution located in? (Single choice)

A. Eastern region

B. Central region

C. Western region

## The dental technology program at your institution has a duration of ______ years, including ______ years on campus and ______ years of internship. The average annual enrollment in the past three years is ______ students. The program was established in ______. (Fill in the blank)

## What type of higher education institution is yours? (Single choice)

A. Public

B. Private

## What type of organization does your unit belong to? (Single choice)

A. Dental laboratories/Dental prosthesis manufacturers

B. Material companies

C. Dental clinics or hospitals

D. Others, such as: _______________

## What is the size of your organization? (Single choice)

A. Small (fewer than 50 employees)

B. Medium (50–300 employees)

C. Large (more than 300 employees)

# Employment market perceptions

## What types of organizations do you think recent graduates with a bachelor's degree in dental technology can work in? (Multiple choice)

A. Dental laboratories/Dental prosthesis manufacturers

B. Vocational colleges or universities

C. Material companies

D. Dental clinics or hospitals

E. Others, such as: _______________

## What types of positions do you think recent graduates with a bachelor's degree in dental technology can work in? (Multiple choice)

A. Ceramics department

B. Quality control

C. Digital department

D. Administrative management

E. Research and development department

F. Clinical service department

G. Events department

H. Others, such as: _______________

# Competency requirements

## What qualities do you think graduates of dental technology programs need to possess? (Multiple choice)

A. Adhere to laws and professional ethics

B. Act with integrity, dedication, and integrate knowledge with practice

C. Exhibit strong teamwork spirit

D. Possess a healthy physique, sound mentality, and well-rounded character

E. Demonstrate good behavioral habits and self-management skills

F. Develop awareness of career planning

G. Cultivate aesthetic and humanistic literacy

H. Others, such as: _______________

## What professional knowledge do you think graduates of dental technology programs need to possess? (Multiple choice)

A. Laws and regulations relevant to the profession

B. Fundamental knowledge of stomatology

C. Professional knowledge of dental prosthesis fabrication

D. Knowledge of prosthetic denture production management and business operations

E. Knowledge of dentist-technician communication and oral clinical services

F. Research methodology, literature retrieval, and thesis writing

## What skills do you think graduates of dental technology programs need to possess? (Multiple choice)

A. Problem-solving and innovative thinking

B. Computer and specialized software operation skills

C. English reading and basic communication skills in the profession

D. Effective clinical communication and collaboration with dentists

E. Prosthesis design and fabrication skills

F. Literature retrieval and awareness of dental technology trends

G. Basic business management and marketing skills

H. Self-directed and lifelong learning skills

# Curriculum design

## What dental specialized courses do you think should be offered in the dental technology program? (Ranking question)

A. Prosthodontics

B. Oral and Maxillofacial Surgery

C. Cariology and Endodontics

D. Diseases of the Oral Mucosa

E. Periodontics

F. Orthodontics

G. Others, such as: _______________

## What dental fundamental courses do you think should be offered in the dental technology program? (Ranking question)

A. Oral Anatomy and Physiology

B. Dental Materials

C. Oral Histology and Pathology

D. Dental Occlusion

E. Oral and Maxillofacial Radiology

F. Others, such as: _______________

## What dental technology courses do you think should be offered in the dental technology program? (Ranking question)

A. Complete Denture Fabrication

B. Removable Partial Denture Fabrication

C. Fixed Dental Prosthesis Fabrication

D. Dental CAD/CAM Technology

E. Implant-Supported Denture Technology

F. Precision Attachment Denture Technology

G. Others, such as: _______________

## Which of the following aesthetics courses do you think should be offered? (Ranking question)

A. Light and Shadow in Sketching

B. Color and Pen Drawing

C. Dental Photography

D. Aesthetic Dentistry

E. Not Necessary

F. Others, such as: _______________

## Which of the following computer courses do you think should be offered? (Ranking question)

A. Programming Languages
B. Python for Big Data
C. 3D Computer Modeling
D. Not Necessary
E. Others, such as: _______________
